# Supplementary material
Source: PubMed Central journal article supplement (PMC2825458)
Supplement: supp_M109.060640_jbc.M109.060640-1.pdf [file supp_M109.060640_jbc.M109.060640-1.pdf]

## SUPPLEMENTAL DATA

Supplemental Table 1. Sequences and annotations

| AGI accession number | notation | GenBank Accession | consensus with the cDNA sequences obtained from this work (single nucleotide substitutions) |
|----------------------|----------|-------------------|---------------------------------------------------------------------------------------------|
| At2g28305            | MoBP1    | AY086265.1        | yes (A154 -> T)                                                                             |
| At5g11950            | MoBP2    | BT011985.1        | yes (G732 -> A)                                                                             |
| At2g37210            | MoBP3    | AY102554.1        | yes (-)                                                                                     |
| At4g35190            | MoBP4    | BT026408.1        | yes (-)                                                                                     |
| At3g53450            | MoBP5    | *NM_115205.1      | yes (-)                                                                                     |
| At5g03270            | MoBP6    | AY050382.1        | no                                                                                          |
| At5g06300            | MoBP7    | AK119117.1        | yes (-)                                                                                     |
| At2g35990            | MoBP8    | AY924758.1        | yes (-)                                                                                     |
| At5g26140            | MoBP9    | *NM_122515.1      | no                                                                                          |

\* NCBI Reference Sequence

Supplemental Table 2. Sequences of MoBP cDNAs, being non consistent with the corresponding annotations

| AGI accession number | notation | experimental verified sequence from this work                                                                                                                                                                                                                                                                                                                                                                                                                                                                                                                                                                                                                                                                                                                                                                                                                                                           |
|----------------------|----------|---------------------------------------------------------------------------------------------------------------------------------------------------------------------------------------------------------------------------------------------------------------------------------------------------------------------------------------------------------------------------------------------------------------------------------------------------------------------------------------------------------------------------------------------------------------------------------------------------------------------------------------------------------------------------------------------------------------------------------------------------------------------------------------------------------------------------------------------------------------------------------------------------------|
| At5g03270            | MoBP6    | atggagaatg aagagggaaa aagagagatg acgaagaaac<br>aaagttcaag gtttaagagc atttgcgtct tttgtgggag<br>tagcaatggg aacaaagcta gttatcagga tgcagccatt<br>gatttgcca aggaactggt gatgaggaag attgatcttg<br>tttatggtgg aggaagcata ggtttaatgg gtttggtgtc<br>tcaagctgtt catgatggtg gtcgtcatgt tattggagtc<br>atccccaaag tcctcatgtt gcaagagtta actggagaaa<br>cagtaggaga agtgaaggaa gttgcagaca tgcatcagag<br>aaaagctgtg atggctaagc attctgatgc tttcattact<br>ttgcctggtg gctatggtac actagaggag ctacttgaag<br>tgataacttg ggcacaactt ggtgtccatg ataaaccggt<br>cggtttatta aacgttgatg gatattacga tgcattgctg<br>ttattcatcg acaaagccgt cgaagagga tttattcttc<br>caaccgctcg acatattatc gtatctgcac caaccgcaag<br>agagttgttt ataaaattgg aggtatatcg atagatgata<br>cggatttaac cctaaaccga accatacagt atatccaagt<br>catgatcccg ttatgattta ttattttcta gttgaatatg<br>gtatcactag atcgaatata taaacatgca ttatctttgt<br>ttcaagttat gtctaaagct ggtag |
| At5g26140            | MoBP9    | atgcatattg agcacatatc tggtgagact gttggagagg<br>taagaattgt ttcagacatg caccgagcga aagctacaat<br>ggctcaagaa gctggggctt tcattgcgct cctaggaggt<br>atgaaactat ggaggaacta ctggagatga                                                                                                                                                                                                                                                                                                                                                                                                                                                                                                                                                                                                                                                                                                                           |

Supplemental Table 3. Oligonucleotide primer sequences used for cloning of *Arabidopsis* MoBP cDNAs

| cDNA encoding protein | Oligonucleotide                            | Sequence (5' → 3')                      |
|-----------------------|--------------------------------------------|-----------------------------------------|
| MoBP1                 | Forward Primer (pQE 80)                    | ttataggatc catggagata gaatc             |
|                       | Reverse Primer (pQE 80)                    | aataggtacc tcactcttgag atttcac          |
| MoBP2                 | Forward Primer (pQE 80)                    | cctgagggaa taccttgatt tgtag             |
|                       | Reverse Primer (pQE 80)                    | gtttcatatt gcaacaagat ttgag             |
| MoBP3                 | Forward Primer (pGEM <sup>®</sup> -T Easy) | tcaaagaaac cttaaactgc ttacc             |
|                       | Forward Primer (pQE 80)                    | tatatggatc catggaaatc aaaaggtgaa tcgatg |
|                       | Reverse Primer (pGEM <sup>®</sup> -T Easy) | caactaatca aaatctatcc cttcc             |
|                       | Reverse Primer (pQE 80)                    | ttatatggta cctcactctt cagaggagta acc    |
| MoBP4                 | Forward Primer (pGEM <sup>®</sup> -T Easy) | tcccaaatcc acaaaagaga g                 |
|                       | Forward Primer (pQE 80)                    | ttatatggat ccatggaaat agtgaagtcg ag     |
|                       | Reverse Primer (pGEM <sup>®</sup> -T Easy) | gaaaccccag aaaacaaca ac                 |
|                       | Reverse Primer (pQE 80)                    | ttatataagc ttctaaaggg caatctcagt ctgc   |
| MoBP5                 | Forward Primer (pQE 80)                    | ttatatggat ccatggaggt caacaatgaa ac     |
|                       | Reverse Primer (pQE 80)                    | ttatatggta cctcagtctt cagaagagta gtc    |
| MoBP6                 | Forward Primer (pQE 80)                    | ttatatggat ccatggaggt caacaatgaa ac     |
|                       | Reverse Primer (pQE 80)                    | ttatatggta cctcagtctt cagaagagta gtc    |
| MoBP7                 | Forward Primer (pQE 80)                    | ttatatggat ccatggaagag acaaaatcga g     |
|                       | Reverse Primer (pQE 80)                    | ttatataagc ttttacgtagc ggtagctac        |
| MoBP8                 | Forward Primer (pGEM <sup>®</sup> -T Easy) | gtatacttct tcttcacttc cc                |
|                       | Forward Primer (pQE 80)                    | ttatatggat ccatggaaga gacaaaatca ag     |
|                       | Reverse Primer (pGEM <sup>®</sup> -T Easy) | ggcaagttcc attggtatat aagctc            |
|                       | Reverse Primer (pQE 80)                    | ttatataagc ttctaaaacg agtcgccttc caaag  |
| MoBP9                 | Forward Primer (pGEM <sup>®</sup> -T Easy) | gatatcttgg agagtctcat aagg              |
|                       | Forward Primer (pQE 80)                    | tatataggat ccatgcatat tgagcacata tctg   |
|                       | Reverse Primer (pGEM <sup>®</sup> -T Easy) | cagatcactc taattgattc cc                |
|                       | Reverse Primer (pQE 80)                    | aaatttaagc tttcattgag gcttgttctc atttag |

```

At2g28305 1 MMEI-----ESKFKRICVFCGSSAGNKVSYKDAATELGTTELVSRLIDLVIYGGGSLGLMGLISQAVFNGGRHVIG
At5g11950 1 MMEINQ-----RSRFRKICVFCGSSHSCHREVSDDAATELGNELVKRKIDLVIYGGGSLGLMGLISRRVYEGGLEHVLG
At2g37210 1 -MEIKG-----ESMQKSKFRRICVFCGSSQCKKSSYQDAADLDLGNELVSRNIDLVIYGGGSLGLMGLVSQAVHDGGRHVIG
At4g35190 1 -MEIV-----KSRFKRVCVFCGSSSCKKRECYSDAATDLAQELVTRRELNLVIYGGGSLGLMGLVSQAVHEAGGHEVLG
At3g53450 1 -MEVNN-----ETMQKSKFRICVFCGSSQCKKSSYQDAADLDLGNELVLRNIDLVIYGGGSLGLMGLVSQAVHDGGRHVIG
At5g03270 1 -MENEKGKREMTKKQSSRFKSIKICVFCGSSNGKASVQDAADLAKELVMRKIDLVIYGGGSLGLMGLVSQAVHDGGRHVIG
At5g06300 1 -MEET-----KSRFKRICVFCGSSSCKKPSYQEAATQLGNELVRRIDLVIYGGGSLGLMGLVSQAVHHGGRHVIG
At2g35990 1 -MEET-----KSRFRICVFCGSSSCKKTYTHDAALQLAHQLVERNIDLVIYGGGSLGLMGLISQAVHDGGRHVIG
At5g26140 -----

At2g28305 70 VIPKTLMPREITGETVGEVKAIVADMHORKAEMAKHSDAFIALPGGYGTLEELLEVIITWAQLGIHDKPVGLLNVDGYNSL
At5g11950 72 IIPKALMPTEISGETVGDVVRVADMHERKAAQAQAEAFIALPGGYGTMEELLEMITWSQLGIHKKIVGLLNVDGYNNL
At2g37210 75 IIPKTLMPREITGETVGEVRAVADMHORKAEMAKHSDAFIALPGGYGTLEELLEVIITWAQLGIHDKPVGLLNVDGYNSL
At4g35190 70 IIPKTLMDKEITGETYGEVIAVADMHERKAEEMARHSDCFIALPGGYGTLEELLEVIITWAQLGIHDKPVGLLNVDGYNYL
At3g53450 75 VIPKTLMPREITGETVGEVRAVADMHORKAEMARHSDAFIALPGGYGTLEELLEVIITWAQLGIHDKPVGLLNVDGYNSL
At5g03270 80 VIPKLLMLQELTGETVGEVKEVADMHORKAVMAKHSDAFIALPGGYGTLEELLEVIITWAQLGVHDKPVGLLNVDGYNDAL
At5g06300 70 VIPKTLMPREITGETVGEVKAIVADMHORKAEMARQADAFIALPGGYGTLEELLEVIITWAQLGIHRKPVGLLNVDGYNSL
At2g35990 70 IIPKSLAPREITGESIGEVIITVSTMHORKAEMGRQADAFIALPGGYGTLEELLEVIITWSQLGIHKKPVGLLNVDGYNSL
At5g26140 1 -----MHIEHLSGETVGEVRIIVSDMHERKAAQAQAEAFIALLGC-----MKLWRN-----YWR--

At2g28305 150 LSFIDKAVEEGFISPTARHIIVSAPSAKELVKKLEDYVPRHEKVASKKSWEMEQIGLSPTCEISR-----
At5g11950 152 LALFDITGVEEGFIKPGARNIIVSAPTAKELMEKMEBYTPSHMHVASHESMKVEELGDYPGQENKQP-----
At2g37210 155 LSFIDKAVEEGFISPTAREIIVSAPTAKELVKKLEBYAPCHERVATKLCWEMERIGYSSEE-----
At4g35190 150 LTFIDKAVDDGFIKPSQRHIFVSAPNAKELVQKLEAYKPVNDGVIASRWEVEKKVQQPQQQQVFCNSNTSMQTEIAL
At3g53450 155 LSFIDKAVEEGFISTNARQIIVSAPTAKELVKKLEBYSPCHESVATKLCWEIERIDYSSD-----
At5g03270 160 LLFIDKAVEEGFILPTARHIIVSAPTARELFIKLEVYR-----
At5g06300 150 LTFIDKAVEEGFISPMARRIIVSAPNAKELVRQLEBYEPEFDEITSKLVWDEVDRISYVPGSEVATAT-----
At2g35990 150 LTFIDKAVEEGFVSSSTARRIIVSAPNAPOLLQLEBYVPEKHDDFVSMVWNTTDAFTLEGDSF-----
At5g26140 -----

```

Supplemental Figure 1. Sequence-alignment of *Arabidopsis* MoBP proteins. The alignment was generated with ClustalW. Identical residues are shaded in black and similar residues are shaded in grey. The lysine decarboxylase associated motif is boxed in red.

|           | Exon1                                         | Exon2         |             |
|-----------|-----------------------------------------------|---------------|-------------|
| At2g28305 | MMEI-----ESKFKRICVFCGSSAGNKVSYKDAAI           | ELGTELVSRNIDL | VYGGGS 49   |
| At5g11950 | MMEDNQ-----RSRFRKICVFCGSHSGHREVFSDAAI         | ELGNELVKRKID  | LVDYGGGS 51 |
| At2g37210 | -MEIKG-----ESMQKSKFRRICVFCGSSQKKSSYQDAAVD     | LGNELVSRNIDL  | VYGGGS 54   |
| At4g35190 | -MEIV-----KSRFRKVCVFCGSSSGKRECYSDAATDLAQEL    | VTRRLNL       | VYGGGS 49   |
| At3g53450 | -MEVNN-----ETMQKSKFGRICVFCGSSQKKSSYQDAAVD     | LGNELVLRNIDL  | VYGGGS 54   |
| At5g03270 | -MENEKGKREMTKKQSSRFKICVFCGSSNGNKASYQDAADLAKEL | VMRKIDL       | VYGGGS 59   |
| At5g06300 | -MEET-----KSRFRKICVFCGSSSGKKPSYQEAAL          | QLGNELVERRIDL | VYGGGS 49   |
| At2g35990 | -MEET-----KSRFRKICVFCGSSSGNKTTYHDAALQLAHQL    | VERNIDL       | VYGGGS 49   |

  

|           | Exon2                | Exon3         | Exon4                        |               |               |
|-----------|----------------------|---------------|------------------------------|---------------|---------------|
| At2g28305 | IGLMGLISQAVFNGGRHVI  | GVIPKTLMPREIT | TGETVGEVKAVADMHQKAE          | MAKHSDAFI 109 |               |
| At5g11950 | VGLMGLISRRVYEGGLHVL  | GIIPKALMPIEIS | GETVGDVRRVADMHERKAAMAQ       | EAEAFI 111    |               |
| At2g37210 | IGLMGLVSQAVHDGGRHVI  | GIIPKTLMPRELT | TGETVGEVRAVADMHQKAE          | MAKHSDAFI 114 |               |
| At4g35190 | IGLMGLVSQAVHEAGGHVLC | GIIPRTLMDKEIT | GETYGEVIAVADMHERKAEMARHSDCFI | 109           |               |
| At3g53450 | IGLMGLVSQAVHDGGRHVI  | GVIPKTLMPRELT | TGETVGEVRAVADMHQKAE          | MARHSDAFI 114 |               |
| At5g03270 | IGLMGLVSQAVHDGGRHVI  | GVIPKLLMLQELT | TGETVGEVKEVADMHQKAV          | MAKHSDAFI 119 |               |
| At5g06300 | VGLMGLVSQAVHHGGRHVL  | GVIPKTLMPREIT | GETIGEVEKAVADMHQKAE          | MARQADAFI 109 |               |
| At2g35990 | VGLMGLISQAVHDGGRHVL  | GIIPKSLAPREIT | GESIGEVI                     | TVSTMHQKAE    | MGRQADAFI 109 |

  

|           | Exon5                         | Exon6                            |              |
|-----------|-------------------------------|----------------------------------|--------------|
| At2g28305 | ALPGGYGTLEELLELEVITWAQLGIHDKP | VGLLNVDGYNSLLSFIDKAVEEGFISPTARHI | 169          |
| At5g11950 | ALPGGYGTMEELLEMITWSQLGIHKKTV  | GLLNVDGYNNLLALFDTGVEEGFIKPGARNI  | 171          |
| At2g37210 | ALPGGYGTLEELLELEVITWAQLGIHDKP | VGLLNVDGYNSLLSFIDKAVEEGFISPTAREI | 174          |
| At4g35190 | ALPGGYGTLEELLEVIWAQQLGIHDKP   | VGLLNVDGYNYLLTFIDKAVDDGF         | IKPSQRHI 169 |
| At3g53450 | ALPGGYGTLEELLELEVITWAQLGIHDKP | VGLLNVDGYNSLLSFIDKAVEEGFISTNARQI | 174          |
| At5g03270 | TLPGGYGTLEELLELEVITWAQLGVHDKP | VGLLNVDGYDALLLIDKAVEEGFILPTARHI  | 179          |
| At5g06300 | ALPGGYGTLEELLELEVITWAQLGIHRKP | VGLLNVDGYNSLLTFIDKAVDEGFISPMARRI | 169          |
| At2g35990 | ALPGGYGTFEELLELEVITWSQLGIHTKP | VGLLNVDGFYDSLTFIDKAVDEGFVSSTARRI | 169          |

  

|           | Exon6           | Exon7                                       |           |
|-----------|-----------------|---------------------------------------------|-----------|
| At2g28305 | IVSAPSAKELVKKLE | DYVPRHEKVASKKSWEMEQIGLSPTCEISR              | ----- 214 |
| At5g11950 | VVSAPTAKELMEKME | EYTPSHMHVASHESWKVEELGDYPGQENKPO             | ----- 217 |
| At2g37210 | IVSAPTAKELVKKLE | EYAPCHERVATKLCWEMERIGYSSEE                  | ----- 215 |
| At4g35190 | FVSAPNAKELVQKLE | AYKPVNDGVIAKSRWEVEKKVQQPQQQQVVFCSNTSMQTEIAL | ----- 228 |
| At3g53450 | IISAPTAKELVKKLE | EYSPCHESVATKLCWEIERIDYSSD                   | ----- 215 |
| At5g03270 | IVSAPTARELF     | IKLEVYR                                     | ----- 197 |
| At5g06300 | IVSAPNAKELVRQLE | EYEPFDEITSKLVWDEVDRISYVPGSEVATAT            | ----- 217 |
| At2g35990 | IVSAPNAPQLLQLE  | EYVPKHDDFVSKMVDNNTTDAFTLEGDSF               | ----- 213 |

Supplemental Figure 2. Exons attributing to the primary sequence of *Arabidopsis* MoBP proteins. Sequence sections encoded by single exons are variously colored black and grey. Non colored residues are encoded by two exons. The alignment was generated with ClustalW.
